# Supplementary material
Source: PubMed Central journal article supplement (PMC3310963)
Supplement: NIHMS334905-supplement-Suppl_Table.pdf [file NIHMS334905-supplement-Suppl_Table.pdf]

**Supplementary table 1. Characteristics of study participants.**

|                       | <b>Controls</b> | <b>%</b> | <b>Cases</b> | <b>%</b> |
|-----------------------|-----------------|----------|--------------|----------|
| <b>Age, mean (SD)</b> | 63.8 (10.3)     |          | 66.1 (12.5)  |          |
| <b>Gender</b>         |                 |          |              |          |
| Male                  | 348             | 87       | 73           | 62       |
| Female                | 51              | 13       | 45           | 38       |
| <b>Region</b>         |                 |          |              |          |
| Barcelona/Baleares    | 197             | 49       | 77           | 65       |
| Valles                | 135             | 34       | 13           | 11       |
| Elche                 | 67              | 17       | 26           | 22       |
| Missing               | -               | -        | 2            | 2        |
| <b>Smoking status</b> |                 |          |              |          |
| Never smoker          | 141             | 35       | 50           | 42       |
| Ever smoker           | 257             | 64       | 64           | 55       |
| Missing               | 1               | 1        | 3            | 3        |
| <b>Diabetes</b>       |                 |          |              |          |
| No                    | 267             | 67       | 91           | 77       |
| Yes                   | 37              | 9        | 27           | 23       |
| Missing               | 95              | 24       | -            | -        |

**Supplementary table 2. Descriptive of toenail trace element (Al, As, Cd, Cr, Cu, Fe, Pb, Mn, Ni, Se, V, Zn) concentrations, in controls and cases. Concentrations are in µg/g.**

| Element        | Controls |        |      |       |         |     | Cases  |        |       |       |         |     | p-value* |
|----------------|----------|--------|------|-------|---------|-----|--------|--------|-------|-------|---------|-----|----------|
|                | Median   | Mean   | S.E. | Min.  | Max.    | N   | Median | Mean   | S.E.  | Min.  | Max.    | N   |          |
| Aluminum (Al)  | 11.43    | 20.53  | 2.08 | 0.64  | 574.62  | 399 | 8.30   | 14.63  | 1.71  | 1.35  | 125.82  | 118 | 5.25E-02 |
| Arsenic (As)   | 0.07     | 0.09   | 0.00 | 0.00  | 0.75    | 399 | 0.07   | 0.10   | 0.01  | 0.00  | 0.55    | 118 | 7.22E-01 |
| Cadmium (Cd)   | 0.01     | 0.08   | 0.02 | 0.00  | 9.04    | 399 | 0.03   | 0.10   | 0.04  | 0.00  | 4.53    | 118 | 1.22E-06 |
| Chromium (Cr)  | 0.40     | 1.11   | 0.14 | 0.00  | 30.74   | 399 | 0.43   | 1.12   | 0.28  | 0.01  | 26.93   | 118 | 3.77E-01 |
| Copper (Cu)    | 3.45     | 4.08   | 0.19 | 1.42  | 59.15   | 399 | 3.48   | 4.17   | 0.30  | 1.24  | 34.44   | 118 | 3.35E-01 |
| Iron (Fe)      | 13.94    | 35.46  | 7.48 | 2.63  | 2837.72 | 399 | 13.43  | 35.93  | 13.90 | 4.15  | 1639.73 | 118 | 9.29E-01 |
| Lead (Pb)      | 0.47     | 1.07   | 0.13 | 0.00  | 30.91   | 399 | 0.88   | 2.71   | 1.34  | 0.00  | 156.81  | 118 | 2.07E-07 |
| Manganese (Mn) | 0.29     | 0.67   | 0.07 | 0.01  | 17.41   | 399 | 0.22   | 0.49   | 0.07  | 0.04  | 4.20    | 118 | 7.70E-02 |
| Nickel (Ni)    | 0.39     | 1.59   | 0.31 | 0.00  | 81.72   | 399 | 0.23   | 0.65   | 0.28  | 0.01  | 33.58   | 118 | 3.72E-06 |
| Selenium (Se)  | 0.60     | 0.62   | 0.01 | 0.06  | 3.92    | 399 | 0.51   | 0.52   | 0.01  | 0.00  | 0.77    | 118 | 2.19E-11 |
| Vanadium (V)   | 0.02     | 0.05   | 0.01 | 0.00  | 1.07    | 397 | 0.02   | 0.04   | 0.01  | 0.00  | 0.79    | 118 | 9.97E-01 |
| Zinc (Zn)      | 107.22   | 128.48 | 5.14 | 63.71 | 990.19  | 399 | 110.80 | 120.33 | 4.05  | 35.54 | 420.80  | 118 | 1.19E-01 |

\*The p-value is for the Mann-Whitney U test.

**Supplementary table 3. Odds ratios (OR), 95% confidence intervals (L95CI-U95CI), and p-values for the association between toenail trace elements (Al, As, Cd, Cr, Cu, Fe, Pb, Mn, Ni, Se, V, Zn) and pancreatic cancer risk. Estimates are adjusted for age, gender, region and smoking status. Estimates further adjusted for diabetes status are also presented.**

|                      | Min. Conc. (µg/g) | Max. Conc. (µg/g) | Controls | %  | Cases | %  | OR   | L95CI | U95CI | p-value  | OR†  | L95CI† | U95CI† | p-value† |
|----------------------|-------------------|-------------------|----------|----|-------|----|------|-------|-------|----------|------|--------|--------|----------|
| <b>Aluminum (Al)</b> |                   |                   |          |    |       |    |      |       |       |          |      |        |        |          |
| Q1                   |                   | ≤ 5.5415          | 99       | 25 | 32    | 29 | 1.00 |       |       |          | 1.00 |        |        |          |
| Q2                   | 5.5416            | 11.4329           | 100      | 25 | 37    | 33 | 0.92 | 0.51  | 1.67  | 7.94E-01 | 0.94 | 0.51   | 1.73   | 8.34E-01 |
| Q3                   | 11.4330           | 21.6806           | 100      | 25 | 26    | 23 | 0.88 | 0.47  | 1.65  | 6.89E-01 | 0.89 | 0.46   | 1.71   | 7.28E-01 |
| Q4                   | > 21.6806         |                   | 99       | 25 | 16    | 14 | 0.58 | 0.29  | 1.19  | 1.37E-01 | 0.56 | 0.27   | 1.18   | 1.28E-01 |
| Trend*               |                   |                   |          |    |       |    |      |       |       | 1.23E-01 |      |        |        | 1.12E-01 |
| <b>Arsenic (As)</b>  |                   |                   |          |    |       |    |      |       |       |          |      |        |        |          |
| Q1                   |                   | ≤ 0.0518          | 100      | 25 | 34    | 30 | 1.00 |       |       |          | 1.00 |        |        |          |
| Q2                   | 0.0519            | 0.0709            | 100      | 25 | 21    | 19 | 0.81 | 0.42  | 1.56  | 5.26E-01 | 0.88 | 0.45   | 1.72   | 6.98E-01 |
| Q3                   | 0.0710            | 0.1061            | 100      | 25 | 23    | 20 | 1.22 | 0.63  | 2.36  | 5.51E-01 | 1.12 | 0.57   | 2.19   | 7.45E-01 |
| Q4                   | > 0.1061          |                   | 98       | 25 | 35    | 31 | 2.02 | 1.08  | 3.78  | 2.87E-02 | 1.97 | 1.03   | 3.75   | 3.94E-02 |
| Trend*               |                   |                   |          |    |       |    |      |       |       | 9.01E-03 |      |        |        | 1.75E-02 |
| <b>Cadmium (Cd)</b>  |                   |                   |          |    |       |    |      |       |       |          |      |        |        |          |
| Q1                   |                   | ≤ 0.0080          | 100      | 25 | 17    | 15 | 1.00 |       |       |          | 1.00 |        |        |          |
| Q2                   | 0.0081            | 0.0134            | 99       | 25 | 11    | 10 | 0.87 | 0.37  | 2.03  | 7.45E-01 | 0.92 | 0.39   | 2.20   | 8.57E-01 |
| Q3                   | 0.0135            | 0.0291            | 100      | 25 | 27    | 24 | 2.04 | 1.00  | 4.17  | 5.14E-02 | 2.18 | 1.04   | 4.55   | 3.79E-02 |
| Q4                   | > 0.0291          |                   | 99       | 25 | 59    | 52 | 3.58 | 1.86  | 6.88  | 1.29E-04 | 3.96 | 2.02   | 7.78   | 6.46E-05 |
| Trend*               |                   |                   |          |    |       |    |      |       |       | 4.65E-06 |      |        |        | 3.32E-06 |
| <b>Chromium (Cr)</b> |                   |                   |          |    |       |    |      |       |       |          |      |        |        |          |
| Q1                   |                   | ≤ 0.1556          | 100      | 25 | 18    | 16 | 1.00 |       |       |          | 1.00 |        |        |          |
| Q2                   | 0.1557            | 0.4022            | 99       | 25 | 37    | 33 | 2.02 | 1.02  | 3.98  | 4.37E-02 | 2.08 | 1.02   | 4.26   | 4.47E-02 |
| Q3                   | 0.4023            | 0.9282            | 100      | 25 | 31    | 27 | 1.94 | 0.97  | 3.91  | 6.25E-02 | 1.72 | 0.83   | 3.56   | 1.47E-01 |
| Q4                   | > 0.9282          |                   | 99       | 25 | 27    | 24 | 1.37 | 0.67  | 2.80  | 3.82E-01 | 1.22 | 0.59   | 2.56   | 5.90E-01 |
| Trend*               |                   |                   |          |    |       |    |      |       |       | 7.50E-01 |      |        |        | 4.46E-01 |
| <b>Copper (Cu)</b>   |                   |                   |          |    |       |    |      |       |       |          |      |        |        |          |
| Q1                   |                   | ≤ 2.8208          | 100      | 25 | 26    | 23 | 1.00 |       |       |          | 1.00 |        |        |          |
| Q2                   | 2.8209            | 3.4505            | 100      | 25 | 30    | 26 | 1.14 | 0.60  | 2.15  | 6.88E-01 | 1.09 | 0.56   | 2.10   | 8.01E-01 |
| Q3                   | 3.4506            | 4.2195            | 99       | 25 | 26    | 23 | 1.12 | 0.58  | 2.19  | 7.33E-01 | 1.01 | 0.51   | 2.01   | 9.76E-01 |
| Q4                   | > 4.2195          |                   | 99       | 25 | 32    | 28 | 1.63 | 0.85  | 3.13  | 1.43E-01 | 1.43 | 0.73   | 2.82   | 2.94E-01 |
| Trend*               |                   |                   |          |    |       |    |      |       |       | 1.35E-01 |      |        |        | 2.84E-01 |
| <b>Iron (Fe)</b>     |                   |                   |          |    |       |    |      |       |       |          |      |        |        |          |
| Q1                   |                   | ≤ 8.3408          | 99       | 25 | 15    | 13 | 1.00 |       |       |          | 1.00 |        |        |          |
| Q2                   | 8.3409            | 13.9367           | 100      | 25 | 46    | 40 | 2.96 | 1.49  | 5.88  | 1.90E-03 | 2.70 | 1.34   | 5.44   | 5.56E-03 |
| Q3                   | 13.9368           | 29.4019           | 100      | 25 | 33    | 29 | 2.68 | 1.32  | 5.47  | 6.58E-03 | 2.46 | 1.18   | 5.10   | 1.57E-02 |
| Q4                   | > 29.4019         |                   | 99       | 25 | 20    | 18 | 1.82 | 0.84  | 3.97  | 1.30E-01 | 1.64 | 0.74   | 3.65   | 2.27E-01 |
| Trend*               |                   |                   |          |    |       |    |      |       |       | 9.88E-01 |      |        |        | 8.12E-01 |

|                       | Min. Conc. (µg/g) | Max. Conc. (µg/g) | Controls | %  | Cases | %  | OR   | L95CI | U95CI | p-value  | OR‡  | L95CI‡ | U95CI‡ | p-value‡ |
|-----------------------|-------------------|-------------------|----------|----|-------|----|------|-------|-------|----------|------|--------|--------|----------|
| <b>Lead (Pb)</b>      |                   |                   |          |    |       |    |      |       |       |          |      |        |        |          |
| Q1                    |                   | ≤ 0.2534          | 99       | 25 | 8     | 7  | 1.00 |       |       |          | 1.00 |        |        |          |
| Q2                    | 0.2535            | 0.4692            | 100      | 25 | 23    | 20 | 2.88 | 1.19  | 6.99  | 1.94E-02 | 2.86 | 1.16   | 7.07   | 2.24E-02 |
| Q3                    | 0.4693            | 0.9750            | 100      | 25 | 33    | 29 | 4.07 | 1.72  | 9.61  | 1.36E-03 | 4.06 | 1.69   | 9.74   | 1.74E-03 |
| Q4                    | > 0.9750          |                   | 99       | 25 | 49    | 43 | 6.26 | 2.71  | 14.47 | 1.77E-05 | 5.59 | 2.38   | 13.13  | 7.90E-05 |
| Trend*                |                   |                   |          |    |       |    |      |       |       | 3.21E-05 |      |        |        | 3.11E-04 |
| <b>Manganese (Mn)</b> |                   |                   |          |    |       |    |      |       |       |          |      |        |        |          |
| Q1                    |                   | ≤ 0.1359          | 99       | 25 | 31    | 27 | 1.00 |       |       |          | 1.00 |        |        |          |
| Q2                    | 0.1360            | 0.2898            | 100      | 25 | 42    | 37 | 1.57 | 0.87  | 2.83  | 1.31E-01 | 1.38 | 0.75   | 2.54   | 3.05E-01 |
| Q3                    | 0.2899            | 0.5995            | 100      | 25 | 21    | 19 | 0.86 | 0.44  | 1.67  | 6.53E-01 | 0.72 | 0.36   | 1.43   | 3.49E-01 |
| Q4                    | > 0.5995          |                   | 99       | 25 | 19    | 17 | 0.95 | 0.47  | 1.91  | 8.86E-01 | 0.86 | 0.42   | 1.79   | 6.91E-01 |
| Trend*                |                   |                   |          |    |       |    |      |       |       | 4.27E-01 |      |        |        | 3.74E-01 |
| <b>Nickel (Ni)</b>    |                   |                   |          |    |       |    |      |       |       |          |      |        |        |          |
| Q1                    |                   | ≤ 0.1856          | 100      | 25 | 40    | 35 | 1.00 |       |       |          | 1.00 |        |        |          |
| Q2                    | 0.1857            | 0.3855            | 99       | 25 | 42    | 37 | 1.10 | 0.63  | 1.92  | 7.38E-01 | 1.14 | 0.64   | 2.04   | 6.62E-01 |
| Q3                    | 0.3856            | 0.8852            | 100      | 25 | 21    | 18 | 0.51 | 0.27  | 0.98  | 4.25E-02 | 0.50 | 0.26   | 0.97   | 4.17E-02 |
| Q4                    | > 0.8852          |                   | 99       | 25 | 11    | 10 | 0.27 | 0.12  | 0.59  | 9.39E-04 | 0.29 | 0.13   | 0.64   | 2.17E-03 |
| Trend*                |                   |                   |          |    |       |    |      |       |       | 1.92E-04 |      |        |        | 4.07E-04 |
| <b>Selenium (Se)</b>  |                   |                   |          |    |       |    |      |       |       |          |      |        |        |          |
| Q1                    |                   | ≤ 0.5198          | 100      | 25 | 59    | 52 | 1.00 |       |       |          | 1.00 |        |        |          |
| Q2                    | 0.5199            | 0.5965            | 100      | 25 | 30    | 27 | 0.57 | 0.32  | 1.01  | 5.45E-02 | 0.58 | 0.32   | 1.05   | 7.03E-02 |
| Q3                    | 0.5966            | 0.6829            | 99       | 25 | 19    | 17 | 0.25 | 0.13  | 0.50  | 5.72E-05 | 0.24 | 0.12   | 0.48   | 5.44E-05 |
| Q4                    | > 0.6829          |                   | 99       | 25 | 5     | 4  | 0.05 | 0.02  | 0.15  | 2.14E-08 | 0.06 | 0.02   | 0.16   | 5.30E-08 |
| Trend*                |                   |                   |          |    |       |    |      |       |       | 8.30E-11 |      |        |        | 2.61E-10 |
| <b>Vanadium (V)</b>   |                   |                   |          |    |       |    |      |       |       |          |      |        |        |          |
| Q1                    |                   | ≤ 0.0102          | 99       | 25 | 20    | 18 | 1.00 |       |       |          | 1.00 |        |        |          |
| Q2                    | 0.0103            | 0.0231            | 99       | 25 | 41    | 37 | 1.93 | 1.02  | 3.65  | 4.37E-02 | 1.89 | 0.97   | 3.66   | 6.00E-02 |
| Q3                    | 0.0232            | 0.0445            | 99       | 25 | 27    | 25 | 1.34 | 0.68  | 2.64  | 3.98E-01 | 1.20 | 0.60   | 2.40   | 6.04E-01 |
| Q4                    | > 0.0445          |                   | 99       | 25 | 22    | 20 | 1.25 | 0.61  | 2.55  | 5.44E-01 | 1.14 | 0.54   | 2.41   | 7.37E-01 |
| Trend*                |                   |                   |          |    |       |    |      |       |       | 7.89E-01 |      |        |        | 6.06E-01 |
| <b>Zinc (Zn)</b>      |                   |                   |          |    |       |    |      |       |       |          |      |        |        |          |
| Q1                    |                   | ≤ 93.3371         | 100      | 25 | 20    | 18 | 1.00 |       |       |          | 1.00 |        |        |          |
| Q2                    | 93.3372           | 107.2220          | 100      | 25 | 32    | 28 | 1.60 | 0.82  | 3.12  | 1.67E-01 | 1.85 | 0.93   | 3.70   | 8.01E-02 |
| Q3                    | 107.2221          | 125.8899          | 100      | 25 | 32    | 28 | 1.27 | 0.65  | 2.50  | 4.85E-01 | 1.44 | 0.72   | 2.90   | 3.03E-01 |
| Q4                    | > 125.8899        |                   | 98       | 25 | 29    | 26 | 1.02 | 0.51  | 2.03  | 9.58E-01 | 1.05 | 0.52   | 2.12   | 9.00E-01 |
| Trend*                |                   |                   |          |    |       |    |      |       |       | 5.86E-01 |      |        |        | 5.56E-01 |

\*Tests for linear trend were carried out by including the median of each quartile of the toenail trace element concentration as a continuous variable in the logistic regression model.

‡Estimates are further adjusted for diabetes status. Ninety-five controls had no information regarding their diabetes status.

**Supplementary table 4. Odds ratios (OR), 95% confidence intervals (L95CI-U95CI), and p-values for the association between toenail trace elements (Al, As, Cd, Cr, Cu, Fe, Pb, Mn, Ni, Se, V, Zn) and pancreatic cancer risk. Estimates are adjusted for age, gender, region and pack-years. Estimates adjusted for duration of cigarette smoking are also presented.**

|                      | Min. Conc. (µg/g) | Max. Conc. (µg/g) | Controls | %  | Cases | %  | OR   | L95CI | U95CI | p-value  | OR‡  | L95CI‡ | U95CI‡ | p-value‡ |
|----------------------|-------------------|-------------------|----------|----|-------|----|------|-------|-------|----------|------|--------|--------|----------|
| <b>Aluminum (Al)</b> |                   |                   |          |    |       |    |      |       |       |          |      |        |        |          |
| Q1                   |                   | ≤ 5.5415          | 62       | 24 | 32    | 29 | 1.00 |       |       |          | 1.00 |        |        |          |
| Q2                   | 5.5416            | 11.4329           | 65       | 26 | 37    | 33 | 0.90 | 0.44  | 1.84  | 7.68E-01 | 0.89 | 0.43   | 1.81   | 7.41E-01 |
| Q3                   | 11.4330           | 21.6806           | 59       | 23 | 26    | 23 | 1.02 | 0.49  | 2.16  | 9.51E-01 | 1.01 | 0.48   | 2.12   | 9.89E-01 |
| Q4                   | > 21.6806         |                   | 68       | 27 | 16    | 14 | 0.44 | 0.19  | 1.04  | 6.11E-02 | 0.43 | 0.18   | 1.01   | 5.40E-02 |
| Trend*               |                   |                   |          |    |       |    |      |       |       | 5.56E-02 |      |        |        | 4.96E-02 |
| <b>Arsenic (As)</b>  |                   |                   |          |    |       |    |      |       |       |          |      |        |        |          |
| Q1                   |                   | ≤ 0.0518          | 59       | 23 | 34    | 30 | 1.00 |       |       |          | 1.00 |        |        |          |
| Q2                   | 0.0519            | 0.0709            | 67       | 26 | 21    | 19 | 0.69 | 0.31  | 1.52  | 3.61E-01 | 0.75 | 0.34   | 1.65   | 4.83E-01 |
| Q3                   | 0.0710            | 0.1061            | 67       | 26 | 23    | 20 | 0.84 | 0.39  | 1.83  | 6.62E-01 | 0.87 | 0.40   | 1.88   | 7.15E-01 |
| Q4                   | > 0.1061          |                   | 61       | 24 | 35    | 31 | 1.75 | 0.82  | 3.75  | 1.51E-01 | 1.78 | 0.83   | 3.82   | 1.37E-01 |
| Trend*               |                   |                   |          |    |       |    |      |       |       | 5.04E-02 |      |        |        | 5.27E-02 |
| <b>Cadmium (Cd)</b>  |                   |                   |          |    |       |    |      |       |       |          |      |        |        |          |
| Q1                   |                   | ≤ 0.0080          | 65       | 26 | 17    | 15 | 1.00 |       |       |          | 1.00 |        |        |          |
| Q2                   | 0.0081            | 0.0134            | 71       | 28 | 11    | 10 | 0.60 | 0.23  | 1.53  | 2.80E-01 | 0.56 | 0.22   | 1.45   | 2.35E-01 |
| Q3                   | 0.0135            | 0.0291            | 62       | 24 | 27    | 24 | 1.49 | 0.65  | 3.39  | 3.46E-01 | 1.32 | 0.58   | 3.00   | 5.03E-01 |
| Q4                   | > 0.0291          |                   | 56       | 22 | 59    | 52 | 3.11 | 1.46  | 6.61  | 3.24E-03 | 2.77 | 1.30   | 5.88   | 8.13E-03 |
| Trend*               |                   |                   |          |    |       |    |      |       |       | 4.71E-05 |      |        |        | 1.17E-04 |
| <b>Chromium (Cr)</b> |                   |                   |          |    |       |    |      |       |       |          |      |        |        |          |
| Q1                   |                   | ≤ 0.1556          | 67       | 26 | 18    | 16 | 1.00 |       |       |          | 1.00 |        |        |          |
| Q2                   | 0.1557            | 0.4022            | 58       | 23 | 37    | 33 | 1.81 | 0.81  | 4.06  | 1.49E-01 | 1.77 | 0.79   | 3.97   | 1.65E-01 |
| Q3                   | 0.4023            | 0.9282            | 71       | 28 | 31    | 27 | 1.42 | 0.64  | 3.16  | 3.85E-01 | 1.42 | 0.64   | 3.16   | 3.91E-01 |
| Q4                   | > 0.9282          |                   | 58       | 23 | 27    | 24 | 1.39 | 0.61  | 3.14  | 4.32E-01 | 1.39 | 0.61   | 3.16   | 4.28E-01 |
| Trend*               |                   |                   |          |    |       |    |      |       |       | 9.10E-01 |      |        |        | 8.83E-01 |
| <b>Copper (Cu)</b>   |                   |                   |          |    |       |    |      |       |       |          |      |        |        |          |
| Q1                   |                   | ≤ 2.8208          | 69       | 27 | 26    | 23 | 1.00 |       |       |          | 1.00 |        |        |          |
| Q2                   | 2.8209            | 3.4505            | 67       | 26 | 30    | 26 | 1.36 | 0.64  | 2.91  | 4.20E-01 | 1.37 | 0.64   | 2.92   | 4.16E-01 |
| Q3                   | 3.4506            | 4.2195            | 59       | 23 | 26    | 23 | 1.31 | 0.59  | 2.90  | 5.00E-01 | 1.30 | 0.59   | 2.87   | 5.15E-01 |
| Q4                   | > 4.2195          |                   | 59       | 23 | 32    | 28 | 1.58 | 0.73  | 3.41  | 2.43E-01 | 1.56 | 0.72   | 3.39   | 2.55E-01 |
| Trend*               |                   |                   |          |    |       |    |      |       |       | 2.89E-01 |      |        |        | 3.05E-01 |
| <b>Iron (Fe)</b>     |                   |                   |          |    |       |    |      |       |       |          |      |        |        |          |
| Q1                   |                   | ≤ 8.3408          | 62       | 24 | 15    | 13 | 1.00 |       |       |          | 1.00 |        |        |          |
| Q2                   | 8.3409            | 13.9367           | 73       | 29 | 46    | 40 | 2.06 | 0.94  | 4.55  | 7.27E-02 | 2.01 | 0.91   | 4.43   | 8.40E-02 |
| Q3                   | 13.9368           | 29.4019           | 61       | 24 | 33    | 29 | 2.17 | 0.96  | 4.89  | 6.32E-02 | 2.08 | 0.92   | 4.70   | 7.78E-02 |
| Q4                   | > 29.4019         |                   | 58       | 23 | 20    | 18 | 1.20 | 0.49  | 2.97  | 6.88E-01 | 1.18 | 0.48   | 2.92   | 7.16E-01 |
| Trend*               |                   |                   |          |    |       |    |      |       |       | 5.35E-01 |      |        |        | 5.37E-01 |

|                       | Min. Conc. (µg/g) | Max. Conc. (µg/g) | Controls | %  | Cases | %  | OR   | L95CI | U95CI | p-value  | OR‡  | L95CI‡ | U95CI‡ | p-value‡ |
|-----------------------|-------------------|-------------------|----------|----|-------|----|------|-------|-------|----------|------|--------|--------|----------|
| <b>Lead (Pb)</b>      |                   |                   |          |    |       |    |      |       |       |          |      |        |        |          |
| Q1                    |                   | ≤ 0.2534          | 68       | 27 | 8     | 7  | 1.00 |       |       |          | 1.00 |        |        |          |
| Q2                    | 0.2535            | 0.4692            | 65       | 26 | 23    | 20 | 2.61 | 0.98  | 6.97  | 5.59E-02 | 2.56 | 0.96   | 6.79   | 5.94E-02 |
| Q3                    | 0.4693            | 0.9750            | 59       | 23 | 33    | 29 | 3.63 | 1.38  | 9.58  | 9.22E-03 | 3.49 | 1.33   | 9.16   | 1.12E-02 |
| Q4                    | > 0.9750          |                   | 62       | 24 | 49    | 43 | 4.31 | 1.69  | 10.95 | 2.17E-03 | 4.12 | 1.62   | 10.45  | 2.91E-03 |
| Trend*                |                   |                   |          |    |       |    |      |       |       | 8.69E-03 |      |        |        | 1.18E-02 |
| <b>Manganese (Mn)</b> |                   |                   |          |    |       |    |      |       |       |          |      |        |        |          |
| Q1                    |                   | ≤ 0.1359          | 63       | 25 | 31    | 27 | 1.00 |       |       |          | 1.00 |        |        |          |
| Q2                    | 0.1360            | 0.2898            | 68       | 27 | 42    | 37 | 1.51 | 0.75  | 3.05  | 2.53E-01 | 1.48 | 0.73   | 3.01   | 2.75E-01 |
| Q3                    | 0.2899            | 0.5995            | 68       | 27 | 21    | 19 | 0.73 | 0.33  | 1.62  | 4.43E-01 | 0.65 | 0.29   | 1.45   | 2.98E-01 |
| Q4                    | > 0.5995          |                   | 55       | 22 | 19    | 17 | 0.79 | 0.34  | 1.84  | 5.88E-01 | 0.77 | 0.33   | 1.79   | 5.38E-01 |
| Trend*                |                   |                   |          |    |       |    |      |       |       | 2.59E-01 |      |        |        | 2.43E-01 |
| <b>Nickel (Ni)</b>    |                   |                   |          |    |       |    |      |       |       |          |      |        |        |          |
| Q1                    |                   | ≤ 0.1856          | 71       | 28 | 40    | 35 | 1.00 |       |       |          | 1.00 |        |        |          |
| Q2                    | 0.1857            | 0.3855            | 60       | 24 | 42    | 37 | 1.21 | 0.63  | 2.33  | 5.63E-01 | 1.23 | 0.64   | 2.35   | 5.36E-01 |
| Q3                    | 0.3856            | 0.8852            | 64       | 25 | 21    | 18 | 0.45 | 0.20  | 0.98  | 4.52E-02 | 0.46 | 0.21   | 1.01   | 5.43E-02 |
| Q4                    | > 0.8852          |                   | 59       | 23 | 11    | 10 | 0.23 | 0.09  | 0.60  | 2.61E-03 | 0.26 | 0.10   | 0.67   | 5.20E-03 |
| Trend*                |                   |                   |          |    |       |    |      |       |       | 5.27E-04 |      |        |        | 1.17E-03 |
| <b>Selenium (Se)</b>  |                   |                   |          |    |       |    |      |       |       |          |      |        |        |          |
| Q1                    |                   | ≤ 0.5198          | 71       | 28 | 59    | 52 | 1.00 |       |       |          | 1.00 |        |        |          |
| Q2                    | 0.5199            | 0.5965            | 70       | 28 | 30    | 27 | 0.61 | 0.31  | 1.17  | 1.36E-01 | 0.55 | 0.28   | 1.07   | 7.96E-02 |
| Q3                    | 0.5966            | 0.6829            | 63       | 25 | 19    | 17 | 0.22 | 0.10  | 0.51  | 4.27E-04 | 0.17 | 0.07   | 0.41   | 7.89E-05 |
| Q4                    | > 0.6829          |                   | 50       | 20 | 5     | 4  | 0.06 | 0.02  | 0.23  | 1.94E-05 | 0.05 | 0.01   | 0.20   | 1.08E-05 |
| Trend*                |                   |                   |          |    |       |    |      |       |       | 2.25E-07 |      |        |        | 7.38E-08 |
| <b>Vanadium (V)</b>   |                   |                   |          |    |       |    |      |       |       |          |      |        |        |          |
| Q1                    |                   | ≤ 0.0102          | 66       | 26 | 20    | 18 | 1.00 |       |       |          | 1.00 |        |        |          |
| Q2                    | 0.0103            | 0.0231            | 64       | 25 | 41    | 37 | 1.54 | 0.73  | 3.23  | 2.53E-01 | 1.51 | 0.72   | 3.18   | 2.73E-01 |
| Q3                    | 0.0232            | 0.0445            | 62       | 25 | 27    | 25 | 1.11 | 0.51  | 2.44  | 7.89E-01 | 1.09 | 0.49   | 2.39   | 8.36E-01 |
| Q4                    | > 0.0445          |                   | 61       | 24 | 22    | 20 | 0.95 | 0.42  | 2.16  | 9.05E-01 | 0.91 | 0.40   | 2.07   | 8.15E-01 |
| Trend*                |                   |                   |          |    |       |    |      |       |       | 5.13E-01 |      |        |        | 4.44E-01 |
| <b>Zinc (Zn)</b>      |                   |                   |          |    |       |    |      |       |       |          |      |        |        |          |
| Q1                    |                   | ≤ 93.3371         | 64       | 25 | 20    | 18 | 1.00 |       |       |          | 1.00 |        |        |          |
| Q2                    | 93.3372           | 107.2220          | 71       | 28 | 32    | 28 | 1.42 | 0.66  | 3.04  | 3.66E-01 | 1.42 | 0.66   | 3.05   | 3.63E-01 |
| Q3                    | 107.2221          | 125.8899          | 59       | 23 | 32    | 28 | 1.21 | 0.55  | 2.66  | 6.41E-01 | 1.20 | 0.54   | 2.66   | 6.48E-01 |
| Q4                    | > 125.8899        |                   | 60       | 24 | 29    | 26 | 0.94 | 0.41  | 2.12  | 8.75E-01 | 0.89 | 0.39   | 2.03   | 7.84E-01 |
| Trend*                |                   |                   |          |    |       |    |      |       |       | 5.96E-01 |      |        |        | 5.06E-01 |

\*Tests for linear trend were carried out by including the median of each quartile of the toenail trace element concentration as a continuous variable in the logistic regression model.

||One hundred forty five controls had no information on pack-years and duration of cigarette smoking.

‡Estimates are adjusted for duration of cigarette smoking.



|                       | Min. Conc. (µg/g) | Max. Conc. (µg/g) | Controls | %  | Cases | %  | OR   | L95CI | U95CI | p-value  |
|-----------------------|-------------------|-------------------|----------|----|-------|----|------|-------|-------|----------|
| <b>Lead (Pb)</b>      |                   |                   |          |    |       |    |      |       |       |          |
| Q1                    |                   | ≤ 0.2534          | 97       | 25 | 8     | 7  | 1.00 |       |       |          |
| Q2                    | 0.2535            | 0.4692            | 100      | 25 | 22    | 20 | 2.60 | 1.06  | 6.38  | 3.70E-02 |
| Q3                    | 0.4693            | 0.9750            | 99       | 25 | 32    | 30 | 3.89 | 1.63  | 9.26  | 2.14E-03 |
| Q4                    | > 0.9750          |                   | 97       | 25 | 46    | 43 | 5.87 | 2.52  | 13.69 | 4.14E-05 |
| Trend*                |                   |                   |          |    |       |    |      |       |       | 5.76E-05 |
| <b>Manganese (Mn)</b> |                   |                   |          |    |       |    |      |       |       |          |
| Q1                    |                   | ≤ 0.1359          | 97       | 25 | 30    | 28 | 1.00 |       |       |          |
| Q2                    | 0.1360            | 0.2898            | 98       | 25 | 41    | 38 | 1.51 | 0.82  | 2.76  | 1.82E-01 |
| Q3                    | 0.2899            | 0.5995            | 99       | 25 | 20    | 19 | 0.75 | 0.38  | 1.47  | 4.00E-01 |
| Q4                    | > 0.5995          |                   | 99       | 25 | 17    | 16 | 0.78 | 0.38  | 1.61  | 5.05E-01 |
| Trend*                |                   |                   |          |    |       |    |      |       |       | 1.98E-01 |
| <b>Nickel (Ni)</b>    |                   |                   |          |    |       |    |      |       |       |          |
| Q1                    |                   | ≤ 0.1856          | 100      | 25 | 39    | 36 | 1.00 |       |       |          |
| Q2                    | 0.1857            | 0.3855            | 98       | 25 | 42    | 39 | 1.13 | 0.64  | 1.99  | 6.76E-01 |
| Q3                    | 0.3856            | 0.8852            | 96       | 24 | 18    | 17 | 0.46 | 0.23  | 0.90  | 2.35E-02 |
| Q4                    | > 0.8852          |                   | 99       | 25 | 10    | 9  | 0.25 | 0.11  | 0.55  | 6.75E-04 |
| Trend*                |                   |                   |          |    |       |    |      |       |       | 1.15E-04 |
| <b>Selenium (Se)</b>  |                   |                   |          |    |       |    |      |       |       |          |
| Q1                    |                   | ≤ 0.5198          | 98       | 25 | 58    | 54 | 1.00 |       |       |          |
| Q2                    | 0.5199            | 0.5965            | 99       | 25 | 27    | 25 | 0.56 | 0.31  | 1.02  | 5.69E-02 |
| Q3                    | 0.5966            | 0.6829            | 99       | 25 | 18    | 17 | 0.27 | 0.14  | 0.53  | 1.45E-04 |
| Q4                    | > 0.6829          |                   | 97       | 25 | 5     | 5  | 0.06 | 0.02  | 0.17  | 1.10E-07 |
| Trend*                |                   |                   |          |    |       |    |      |       |       | 9.06E-10 |
| <b>Vanadium (V)</b>   |                   |                   |          |    |       |    |      |       |       |          |
| Q1                    |                   | ≤ 0.0102          | 96       | 25 | 20    | 19 | 1.00 |       |       |          |
| Q2                    | 0.0103            | 0.0231            | 99       | 25 | 39    | 37 | 1.75 | 0.91  | 3.36  | 9.43E-02 |
| Q3                    | 0.0232            | 0.0445            | 97       | 25 | 25    | 24 | 1.16 | 0.58  | 2.33  | 6.73E-01 |
| Q4                    | > 0.0445          |                   | 99       | 25 | 21    | 20 | 1.03 | 0.50  | 2.14  | 9.31E-01 |
| Trend*                |                   |                   |          |    |       |    |      |       |       | 4.72E-01 |
| <b>Zinc (Zn)</b>      |                   |                   |          |    |       |    |      |       |       |          |
| Q1                    |                   | ≤ 93.3371         | 99       | 25 | 20    | 19 | 1.00 |       |       |          |
| Q2                    | 93.3372           | 107.2220          | 99       | 25 | 30    | 28 | 1.39 | 0.70  | 2.75  | 3.42E-01 |
| Q3                    | 107.2221          | 125.8899          | 98       | 25 | 30    | 28 | 1.16 | 0.58  | 2.32  | 6.68E-01 |
| Q4                    | > 125.8899        |                   | 97       | 25 | 28    | 26 | 1.00 | 0.50  | 2.02  | 9.90E-01 |
| Trend*                |                   |                   |          |    |       |    |      |       |       | 6.93E-01 |

\*Tests for linear trend were carried out by including the median of each quartile of the toenail trace element concentration as a continuous variable in the logistic regression model.

||Five controls and four cases had no information on education.



**Supplementary table 6. Odds ratios (OR), 95% confidence intervals (L95CI-U95CI), and p-values for the association between toenail concentrations of As, Cd, Pb, Ni, and Se) and pancreatic cancer risk. Estimates are adjusted for age, gender, region, smoking status, and significant trace elements (arsenic, cadmium, lead, nickel, and selenium).**

|                      | Min. Conc. (µg/g) | Max. Conc. (µg/g) | Controls % | Cases % | OR | L95CI | U95CI | p-value             |
|----------------------|-------------------|-------------------|------------|---------|----|-------|-------|---------------------|
| <b>Arsenic (As)</b>  |                   |                   |            |         |    |       |       |                     |
| Q1                   |                   | ≤ 0.0518          | 100        | 25      | 34 | 30    | 1.00  |                     |
| Q2                   | 0.0519            | 0.0709            | 100        | 25      | 21 | 19    | 1.29  | 0.59 2.83 5.27E-01  |
| Q3                   | 0.0710            | 0.1061            | 100        | 25      | 23 | 20    | 1.56  | 0.68 3.56 2.93E-01  |
| Q4                   | > 0.1061          |                   | 98         | 25      | 35 | 31    | 1.72  | 0.77 3.86 1.85E-01  |
| Trend*               |                   |                   |            |         |    |       |       | 2.01E-01            |
| <b>Cadmium (Cd)</b>  |                   |                   |            |         |    |       |       |                     |
| Q1                   |                   | ≤ 0.0080          | 100        | 25      | 17 | 15    | 1.00  |                     |
| Q2                   | 0.0081            | 0.0134            | 99         | 25      | 11 | 10    | 0.50  | 0.19 1.35 1.73E-01  |
| Q3                   | 0.0135            | 0.0291            | 100        | 25      | 27 | 24    | 0.96  | 0.41 2.28 9.30E-01  |
| Q4                   | > 0.0291          |                   | 99         | 25      | 59 | 52    | 2.71  | 1.21 6.06 1.49E-02  |
| Trend*               |                   |                   |            |         |    |       |       | 1.64E-04            |
| <b>Lead (Pb)</b>     |                   |                   |            |         |    |       |       |                     |
| Q1                   |                   | ≤ 0.2534          | 99         | 25      | 8  | 7     | 1.00  |                     |
| Q2                   | 0.2535            | 0.4692            | 100        | 25      | 23 | 20    | 3.05  | 1.12 8.34 2.95E-02  |
| Q3                   | 0.4693            | 0.9750            | 100        | 25      | 33 | 29    | 5.28  | 1.90 14.69 1.42E-03 |
| Q4                   | > 0.9750          |                   | 99         | 25      | 49 | 43    | 6.38  | 2.26 18.02 4.61E-04 |
| Trend*               |                   |                   |            |         |    |       |       | 4.56E-03            |
| <b>Nickel (Ni)</b>   |                   |                   |            |         |    |       |       |                     |
| Q1                   |                   | ≤ 0.1856          | 100        | 25      | 40 | 35    | 1.00  |                     |
| Q2                   | 0.1857            | 0.3855            | 99         | 25      | 42 | 37    | 0.79  | 0.40 1.55 4.91E-01  |
| Q3                   | 0.3856            | 0.8852            | 100        | 25      | 21 | 18    | 0.29  | 0.13 0.65 2.35E-03  |
| Q4                   | > 0.8852          |                   | 99         | 25      | 11 | 10    | 0.15  | 0.06 0.39 1.06E-04  |
| Trend*               |                   |                   |            |         |    |       |       | 3.54E-05            |
| <b>Selenium (Se)</b> |                   |                   |            |         |    |       |       |                     |
| Q1                   |                   | ≤ 0.5198          | 100        | 25      | 59 | 52    | 1.00  |                     |
| Q2                   | 0.5199            | 0.5965            | 100        | 25      | 30 | 27    | 0.73  | 0.38 1.40 3.37E-01  |
| Q3                   | 0.5966            | 0.6829            | 99         | 25      | 19 | 17    | 0.23  | 0.11 0.51 2.34E-04  |
| Q4                   | > 0.6829          |                   | 99         | 25      | 5  | 4     | 0.04  | 0.01 0.12 5.65E-08  |
| Trend*               |                   |                   |            |         |    |       |       | 2.30E-10            |

\*Tests for linear trend were carried out by including the median of each quartile of the toenail trace element concentration as a continuous variable in the logistic regression model.
